# Supplementary material
Source: Springer Nature journal article supplement (https://www.springermedizin.de/resource/supplementary/13054_2010_8688_MOESM3_ESM.pdf/9732790)
Supplement: MOESM3 [file 9732790]

Study nameCumulative statisticsCumulative odds ratio ( 95% CI)

|                    | Point | Lower limit | Upper limit | p-Value |
|--------------------|-------|-------------|-------------|---------|
| Gattinoni_ 2001    | 1,111 | 0,709       | 1,742       | 0,646   |
| Guerin_ 2004       | 1,065 | 0,830       | 1,366       | 0,620   |
| Voggenreiter_ 2005 | 1,049 | 0,819       | 1,344       | 0,706   |
| Mancebo_ 2006      | 0,924 | 0,663       | 1,287       | 0,641   |
| Chan_ 2007         | 0,939 | 0,710       | 1,243       | 0,660   |
| Fernandez_ 2008    | 0,931 | 0,722       | 1,200       | 0,579   |
| Taccone_ 2009      | 0,916 | 0,750       | 1,120       | 0,392   |
|                    | 0,916 | 0,750       | 1,120       | 0,392   |

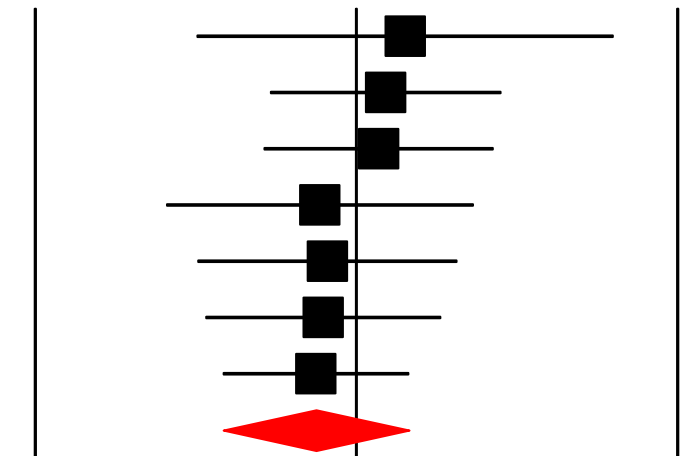

0,5

1

2

Favours Prone

Favours Supine
